# Supplementary material
Source: PubMed Central journal article supplement (PMC4490953)
Supplement: NIHMS687678-supplement-305262R3_Acknowledgment_Permissions.pdf [file NIHMS687678-supplement-305262R3_Acknowledgment_Permissions.pdf]

## Circulation Research

---

**From:** jlawler@bidmc.harvard.edu  
**Sent:** Wednesday, April 15, 2015 11:04 AM  
**To:** circulation.research@circresearch.com  
**Cc:** nsheibanikar@wisc.edu  
**Subject:** <no subject>

Dear Editorial Staff, I am writing to grant my permission to be acknowledged as the source of the TSP-1-null mice in Dr. Nader Sheibani's recent submission to *Circulation Research* on the role of TSP-1 in abdominal aortic aneurysm formation. All my best, Jack

---

This message is intended for the use of the person(s) to whom it may be addressed. It may contain information that is privileged, confidential, or otherwise protected from disclosure under applicable law. If you are not the intended recipient, any dissemination, distribution, copying, or use of this information is prohibited. If you have received this message in error, please permanently delete it and immediately notify the sender. Thank you.

## Circulation Research

---

**From:** Jon Matsumura <MATSUMURA@surgery.wisc.edu>  
**Sent:** Wednesday, April 15, 2015 2:38 PM  
**To:** circulation.research@circresearch.com; Bo Liu  
**Subject:** Re: Fwd: Acknowledgements section

dear editor,

This is In regards to this paper: Circres/2014/30526R1, title: Thrombospondin-1 contributes to the development of vascular inflammation by regulating monocytic cell motility in mouse models of abdominal aortic aneurysm.

I give my permission to be acknowledged for intellectual input in your prestigious journal.

sincerely,

jon matsumura

## Circulation Research

---

**From:** K C. Kent <KENT@surgery.wisc.edu>  
**Sent:** Thursday, April 16, 2015 11:51 AM  
**To:** circulation.research@circresearch.com  
**Subject:** K. Craig Kent - Permission Consent

To Circulation Research:

I consent my permission to be acknowledged in the following paper:

Manuscript number: Circres/2014/30526R1,

Title: Thrombospondin-1 contributes to the development of vascular inflammation by regulating monocytic cell motility in mouse models of abdominal aortic aneurysm Submitted by: Stephanie Morgan

Sincerely,

K. Craig Kent, MD  
A.R. Curreri Professor and Chairman  
Department of Surgery  
University of Wisconsin  
School of Medicine and Public Health  
Phone: (608) 265-8854  
Fax: (608) 265-5963  
Email: kent@surgery.wisc.edu
